# Supplementary material
Source: publisher figshare collection journal article supplement (https://karger.figshare.com/ndownloader/files/16613321)
Supplement: Supplementary file 1 [file 16613321]

**Supplement 1 – Study Eligibility Criteria (Fielding D. et al., First human use of a new robotic-assisted fiber optic sensing navigation system for small peripheral pulmonary nodules)**

**Inclusion Criteria:**

- Patients suitable for surgery or intervention, aged 18 years - 80 years
- Pulmonary nodule(s) (PN) due to suspected lung cancer or metastatic disease or nodule(s) of unknown etiology that require further diagnostic evaluation
- One or more soft tissue dominant pulmonary nodules of ≥ 10mm and ≤30 mm in largest dimension on axial plane
- Nodule completely surrounded by at least 5 mm lung parenchyma, does not touch the hilum or mediastinum, is not associated with adenopathy, atelectasis, or pleural effusion, and the proximal nodule margin (leading edge facing the bronchus & catheter) is more than 1.5 cm distant to the visceral pleura
- Patients with a moderate to high risk of lung cancer based on clinical, demographic and radiologic information using risk prediction algorithms (as described in the review article of Lam and Tammemagi)
- PN accessible bronchoscopically on planning CT reconstruction (within 3 cm proximity to PN)
- Patient able to understand and adhere to study requirements
- Patient able to provide and sign informed consent
- Patient not legally incapacitated

**Exclusion Criteria:**

- An inability to tolerate bronchoscopy under endotracheal intubation and general anesthesia.
- ASA class > 3
- PN touches the pulmonary hilum or mediastinum, or is associated with adenopathy, lobar atelectasis, or pleural effusion
- Central PN’s located within the first 3 airway generations (segmental airways, B1-10)
- The airway leading to the target lesion arises from an aberrant accessory tracheal bronchus
- Continuous use of anticoagulants (eg, heparin, warfarin) or antiplatelet agents (e.g. Cyclooxygenase Inhibitors (Aspirin), ADP-Receptor inhibitors (Clopidogrel), GP-IIB/IIIA- inhibitors (Abciximac), fish oil, etc) which cannot be discontinued.
- Uncorrectable coagulopathy or bleeding diathesis
- Platelet dysfunction or platelet count <100×10
- History of major bleeding with bronchoscopy
- Pulmonary hypertension with mean Pulmonary Arterial Pressure (PAP) >25 mm
- Moderate-to-severe pulmonary fibrosis
- Severe respiratory insufficiency or hypoxia, moderate-to-severe hypoxemia or any degree of hypercarbia
- One or more bullae >1 cm located in close vicinity (<1cm) of target PN
- Giant bullae within the same lobe of the target PN
- Partial tracheal obstruction or obstruction of the superior vena cava
- Any other severe or life-threatening comorbidity that could increase the risk of bronchoscopic biopsy for example:
  - > Stage 3 heart failure (NY-Heart Failure Classification)
  - Unstable hemodynamic status including
- Uncontrolled dysrhythmias
- History of ventricular arrhythmias
- Uncontrolled Hypertension
  (Blood Pressure systolic>200mmHg, Blood Pressure diastolic >120mmHg)
- Unstable Angina
- Myocardial infarction within 6 months
  - Severe cachexia, debility and malnutrition
  - Acute Renal or Liver Failure
- Ongoing systemic acute or chronic infection
- Pneumonia or acute bronchitis within 3 month of the procedure
- Lung abscess
- White Blood Cell (WBC) Count <2000 or >20,000
- Recent head injury or increased intracranial pressure
- Exposure to radiation treatment or chemotherapy within 3 months prior to the IROB procedure
- Participation in any other study in last 30 days
- Prior thoracic surgery on the same side of the lung as the PN or pneumonectomy of the contralateral lung
- Patients who are pregnant or lactating
- Patients with known intrapulmonary metastases of extrapulmonary cancer/tumors
- Persons with any kind of dependency on the investigator or employed by the sponsor or investigator
- Persons held in an institution by legal or official order, or part of vulnerable population (i.e. mentally disabled)
- Known allergy, sensitivity or previous allergic reaction to ortho-phthalaldehyde (OPA)
